# Supplementary material
Source: MDPI journal article supplement (https://www.mdpi.com/2073-4352/7/11/332)
Supplement: s1 [file s1]

## Supplementary Information

# Halogen and Hydrogen Bonding in Multicomponent Crystals of Tetrabromo-1*H*-Benzotriazole

Michele Baldrighi, Pierangelo Metrangolo, Tullio Pilati, Giuseppe Resnati \*, and Giancarlo Terraneo

Laboratory of Nanostructured Fluorinated Materials (NFMLab), Department of Chemistry, Materials, and Chemical Engineering "Giulio Natta", Politecnico di Milano, via L. Mancinelli 7, I-20131 Milano, Italy;  
 michele.baldrighi@polimi.it (M.B.); pierangelo.metrangolo@polimi.it (P.M.); tullio.pilati@gmail.com (T.P.);  
 giancarlo.terraneo@polimi.it (G.T.)

\* Correspondence: giuseppe.resnati@polimi.it; Tel.: +39-02-2399-3032

**Table S1.** Crystallographic data for **1** and **2**.

|                                                                   | <b>1</b>                                                               | <b>2</b>                                                                                          |
|-------------------------------------------------------------------|------------------------------------------------------------------------|---------------------------------------------------------------------------------------------------|
|                                                                   | Crystal data                                                           |                                                                                                   |
| Chemical formula                                                  | C <sub>6</sub> HBr <sub>4</sub> N <sub>3</sub> ·CH <sub>3</sub> OH     | C <sub>6</sub> H <sub>16</sub> N <sub>2</sub> ·2(C <sub>6</sub> HBr <sub>4</sub> N <sub>3</sub> ) |
| Mr                                                                | 466.78                                                                 | 985.68                                                                                            |
| Crystal system, space group                                       | Monoclinic, P2 <sub>1</sub> /c                                         | Monoclinic, P2 <sub>1</sub> /c                                                                    |
| Temperature (K)                                                   | 296                                                                    | 298                                                                                               |
| a, b, c (Å)                                                       | 9.5254 (8), 12.4405 (10), 9.9466 (8)                                   | 9.2969 (12), 9.5812 (14), 15.468 (2)                                                              |
| β (°)                                                             | 91.328 (10)                                                            | 101.183 (12)                                                                                      |
| V (Å <sup>3</sup> )                                               | 1178.36 (17)                                                           | 1351.7 (3)                                                                                        |
| Z                                                                 | 4                                                                      | 2                                                                                                 |
| Radiation type                                                    | Mo Kα                                                                  | Mo Kα                                                                                             |
| μ (mm <sup>-1</sup> )                                             | 13.64                                                                  | 11.89                                                                                             |
| Crystal size (mm)                                                 | 0.40 × 0.40 × 0.12                                                     | 0.34 × 0.22 × 0.12                                                                                |
|                                                                   | Data collection                                                        |                                                                                                   |
| T <sub>min</sub> , T <sub>max</sub>                               | 0.356, 0.745                                                           | 0.427, 0.778                                                                                      |
| No. of measured, independent and observed [I > 2σ(I)] reflections | 8790, 2340, 1720                                                       | 18998, 4483, 3326                                                                                 |
| R <sub>int</sub>                                                  | 0.046                                                                  | 0.040                                                                                             |
| (sin θ/λ) <sub>max</sub> (Å <sup>-1</sup> )                       | 0.619                                                                  | 0.763                                                                                             |
|                                                                   | Refinement                                                             |                                                                                                   |
| R[F <sup>2</sup> > 2σ(F <sup>2</sup> )], wR(F <sup>2</sup> ), S   | 0.031, 0.067, 1.01                                                     | 0.032, 0.073, 1.03                                                                                |
| No. of reflections                                                | 2340                                                                   | 4483                                                                                              |
| No. of parameters                                                 | 145                                                                    | 160                                                                                               |
| No. of restraints                                                 | 1                                                                      | -                                                                                                 |
| H-atom treatment                                                  | H atoms treated by a mixture of independent and constrained refinement | H atoms treated by a mixture of independent and constrained refinement                            |
| Δρ <sub>max</sub> , Δρ <sub>min</sub> (e Å <sup>-3</sup> )        | 0.83, -0.48                                                            | 0.68, -0.86                                                                                       |
| CCDC number                                                       | 1574367                                                                | 1574368                                                                                           |

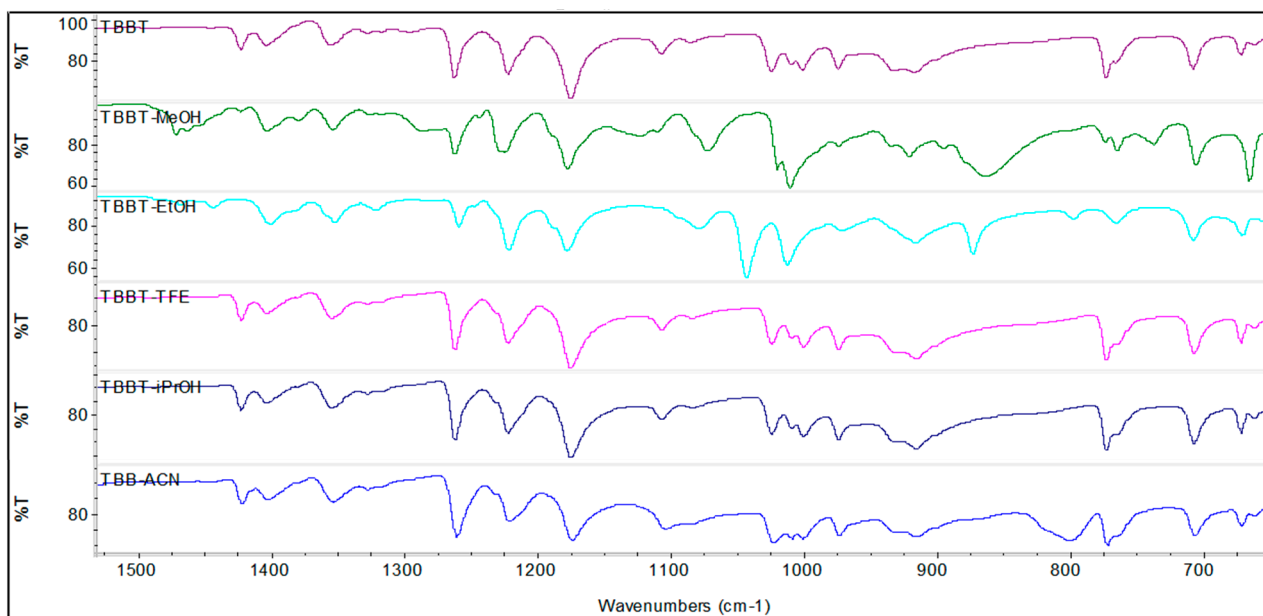

**Figure S1.** FTIR spectra of pure TBBT (top) and of the solids obtained on recrystallization of TBBT from methanol, ethanol, trifluoroethanol, *i*-propanol, and acetonitrile (from second to sixth spectrum in the order). Only in the case of methanol were crystals suitable for single crystal X-ray analyses obtained. It seems that pure TBBT was obtained in all cases, except that of ethanol, which might have formed a solvate, or a polymorph, of TBBT.
